# Supplementary material for: Magnetically separable CdFe2O4/graphene catalyst and its enhanced photocatalytic properties
Source: Royal Society of Chemistry journal article supplement (doi:10.1039/c4ta05419a), 2014-12-16
Supplement: c4ta05419a1.pdf [file c4ta05419a1.pdf]

## Supplementary Information

### Magnetically Separable CdFe<sub>2</sub>O<sub>4</sub>/Graphene Catalyst and its Enhanced Photocatalytic Properties

Danfeng Zhang<sup>a,b</sup> Qiong Wang<sup>a</sup> Lingling Wang<sup>a</sup> Lei Zhang<sup>a\*</sup>

<sup>a</sup>College of Chemistry, Liaoning University, Shenyang 110036, China

<sup>b</sup>College of Sciences, Heilongjiang Bayi Agricultural University, Heilongjiang 163319, China

Electrochemical impedance spectra (EIS) were carried out at the open circuit potential of 10 mV over the frequency range of 100 KHz to 1Hz on a CHI660D electrochemical workstation (Shanghai Chenhua, China). During all measurements, the electrolyte was 0.1 mg·L<sup>-1</sup> Na<sub>2</sub>SO<sub>4</sub>.

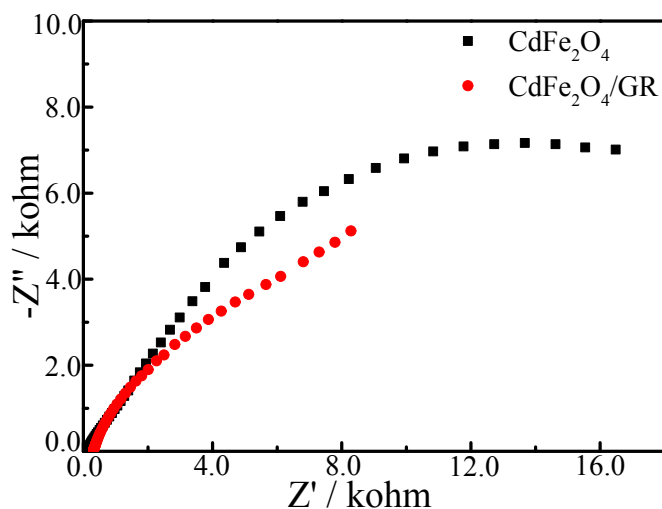

Fig.S1 EIS Nyquist plots of CdFe<sub>2</sub>O<sub>4</sub>/Gr and CdFe<sub>2</sub>O<sub>4</sub> electrodes in 0.1M Na<sub>2</sub>SO<sub>4</sub> aqueous solutions

\* Corresponding author Tel.: +86 24 62207809; Fax: +86 24 62202380.

E-mail address: [zhanglei63@126.com](mailto:zhanglei63@126.com) (L. Zhang).

The improved charge separation and transfer efficiency in  $\text{CdFe}_2\text{O}_4$  and  $\text{CdFe}_2\text{O}_4/\text{GR}$  was further confirmed by electrochemical impedance spectroscopy (EIS) (Fig.1S). The diameter of the arc radius on the EIS Nyquist plot of  $\text{CdFe}_2\text{O}_4/\text{GR}$  is smaller than that of  $\text{CdFe}_2\text{O}_4$ , which implies the higher efficiency of charge transfer for  $\text{CdFe}_2\text{O}_4/\text{GR}$ .
